# Supplementary material for: Small Molecule Identification with MOLGEN and Mass Spectrometry
Source: PubMed Central journal article supplement (PMC3901272; doi:10.3390/metabo3020440), 2013-05-28
Supplement: metabolites-03-00440-s001.pdf [file metabolites-03-00440-s001.pdf]

## Small Molecule Identification with MOLGEN and Mass Spectrometry

Markus Meringer<sup>1</sup> and Emma L. Schymanski<sup>2\*</sup>

<sup>1</sup>DLR: German Aerospace Center, Earth Observation Center (EOC), Münchner Strasse 20, D-82234 Oberpfaffenhofen–Wessling, Germany

<sup>2</sup>Eawag: Swiss Federal Institute of Aquatic Science and Technology, Überlandstrasse 133, CH-8600 Dübendorf, Switzerland.

\* Author to whom correspondence should be addressed; emma.schymanski@eawag.ch, Tel +41 58 765 5537, Fax +41 58 765 5210

### Supporting Information

This file contains supporting information for the abovementioned article and includes:

Table SI-1: The LC Challenges for CASMI 2012. Pages 1-3.

Table SI-2: The GC Challenges for CASMI 2012. Page 4.

[1]: E. L. Schymanski and S. Neumann. CASMI: Challenges and Solutions, Metabolites, in review.

#### Table SI-1: The LC Challenges for CASMI 2012. Source: [1].

---

Challenge 1  
Kanamycin A  
 $C_{18}H_{36}N_4O_{11}$   
PubChem: 6032  
ChemSpider: 5810

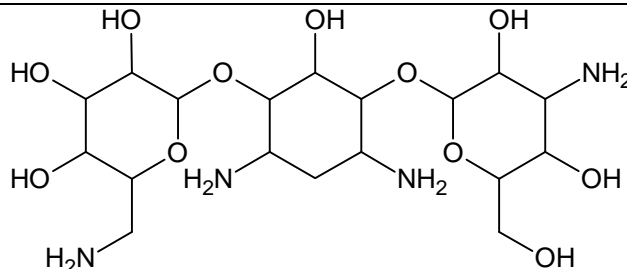

Challenge 2  
1,2-Bis-O-sinapoyl-beta-D-glucoside  
 $C_{28}H_{32}O_{14}$   
PubChem: 5280665  
ChemSpider: 4444262

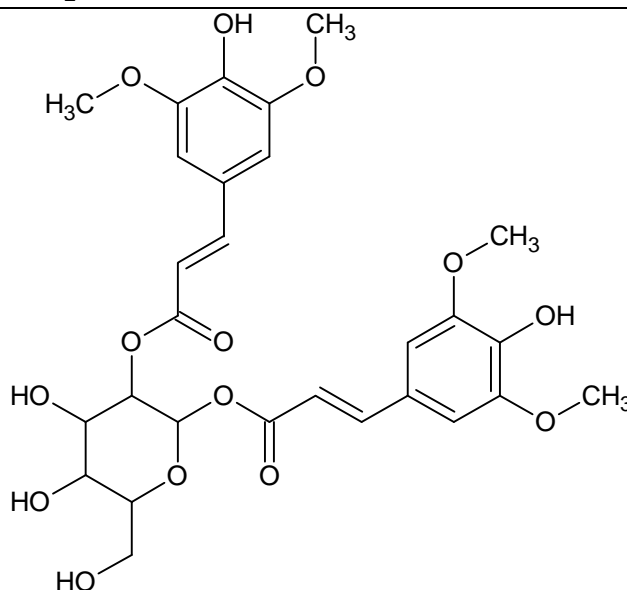

Challenge 3  
Glucosquerellin  
 $C_{14}H_{27}NO_9S_3$   
PubChem: 46173875  
ChemSpider: NA

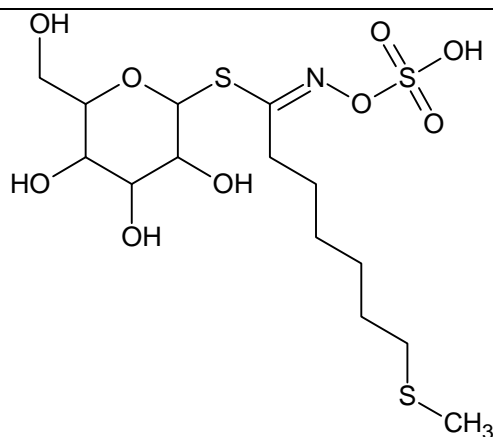

Challenge 4  
Escholtzine  
 $C_{19}H_{17}NO_4$   
PubChem: 12304178  
ChemSpider: 16740500

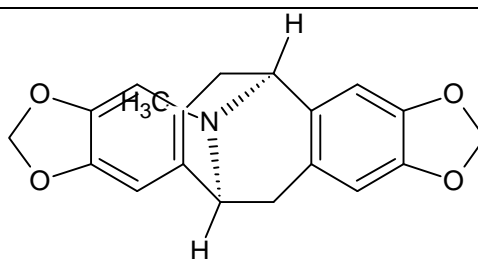

Challenge 5  
Reticuline  
 $C_{19}H_{23}NO_4$   
PubChem: 10233  
ChemSpider: 9816

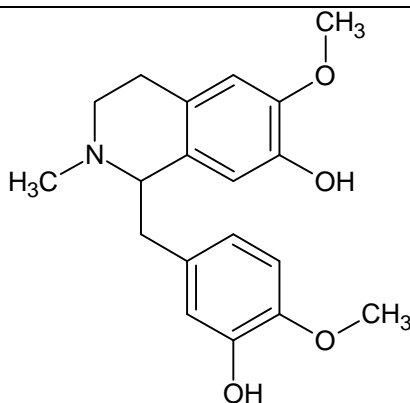

Challenge 6  
Rheadine  
 $C_{21}H_{21}NO_6$   
PubChem: 197775  
ChemSpider: 171184

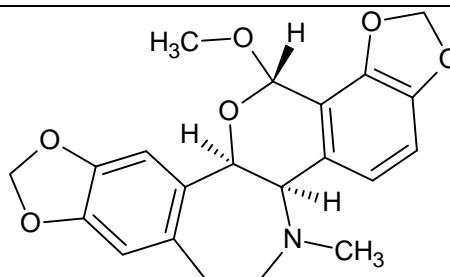

Challenge 10  
1-Aminoanthraquinone  
 $C_{14}H_9NO_2$   
PubChem: 6710  
ChemSpider: 6454

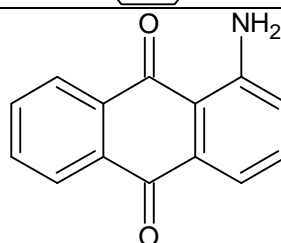

Challenge 11  
1-Pyrenemethanol  
 $C_{17}H_{12}O$   
PubChem: 104977  
ChemSpider: 94729

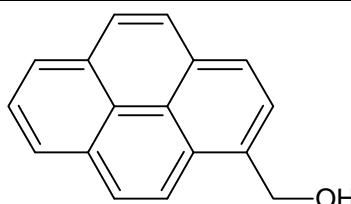

Challenge 12  
alpha-(o-Nitro-p-tolyl  
azo)acetoacetanilide  
 $C_{17}H_{16}N_4O_4$   
PubChem: 221491  
ChemSpider: 192174

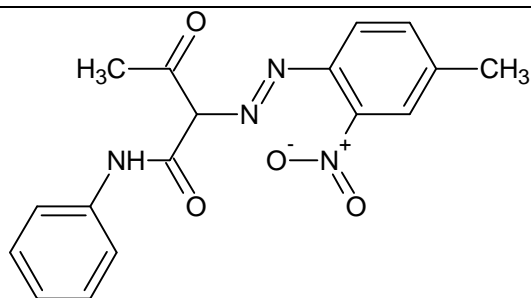

Challenge 13  
Benzyl-diphenyl phosphine  
oxide  
 $C_{19}H_{17}OP$   
PubChem: 76293  
ChemSpider: 68772

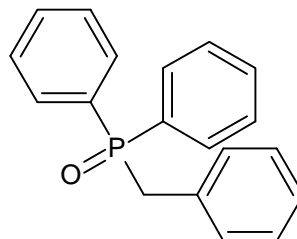

Challenge 14  
1H-Benz[g]indole  
 $C_{12}H_9N$   
PubChem: 98617  
ChemSpider: 89061

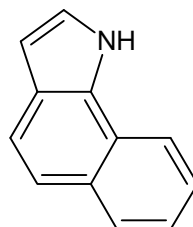

Challenge 15  
1-Isopropyl-5-methyl-1H-  
indole-2,3-dione  
 $C_{12}H_{13}NO_2$   
PubChem: 2145522  
ChemSpider: 1606080

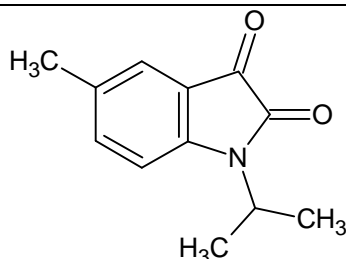

Challenge 16  
1-[(4-Methoxyphenyl) amino]-  
1-oxo-2-propanyl 6-oxo-1-  
propyl-1,6-dihydro-3-  
pyridinecarboxylate  
 $C_{18}H_{21}N_3O_5$   
PubChem: 18091616  
ChemSpider: 16896706

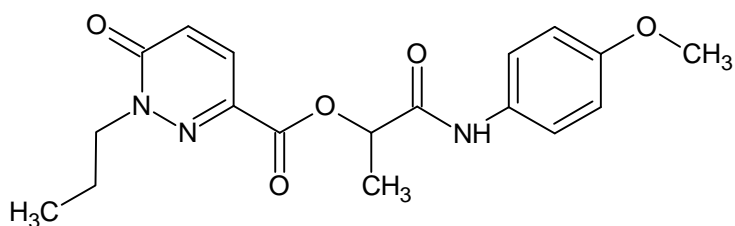

Challenge 17  
Nitrin  
 $C_{13}H_{13}N_3$   
PubChem: 68380  
ChemSpider: 61666

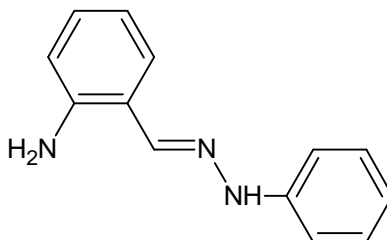

**Table SI-2: The GC Challenges for CASMI 2012. Source: [23].**

|                                                                                                     |  |                                                                                                                 |  |
|-----------------------------------------------------------------------------------------------------|--|-----------------------------------------------------------------------------------------------------------------|--|
| Challenge 1<br>Phthalic anhydride<br>$C_8H_4O_3$<br>PubChem: 6811<br>ChemSpider: 6552               |  | Challenge 2<br>Phthalimide<br>$C_8H_5NO_2$<br>PubChem: 6809<br>ChemSpider: 6550                                 |  |
| Challenge 3<br>2-Chlorobenzyl alcohol<br>$C_7H_7ClO$<br>PubChem: 28810<br>ChemSpider: 26799         |  | Challenge 4<br>4-Chlorobenzyl alcohol<br>$C_7H_7ClO$<br>PubChem: 13397<br>ChemSpider: 12823                     |  |
| Challenge 5<br>1,4-Dichlorobenzene<br>$C_6H_4Cl_2$<br>PubChem: 4685<br>ChemSpider:<br>13866817      |  | Challenge 6<br>Acenaphthene<br>$C_{12}H_{10}$<br>PubChem: 6734<br>ChemSpider: 6478                              |  |
| Challenge 7<br>4-Chlorobenzoic acid<br>$C_7H_5ClO_2$<br>PubChem: 6318<br>ChemSpider: 6079           |  | Challenge 8<br>Fluorene<br>$C_{13}H_{10}$<br>PubChem: 6853<br>ChemSpider: 6592                                  |  |
| Challenge 9<br>Methyl 2-chlorobenzoate<br>$C_8H_7ClO_2$<br>PubChem: 11895<br>ChemSpider: 11402      |  | Challenge 10<br>2,4,6-Trichlorophenol<br>$C_6H_3Cl_3O$<br>PubChem: 6914<br>ChemSpider:<br>21106172              |  |
| Challenge 11<br>Formothion<br>$C_6H_{12}NO_4PS_2$<br>PubChem: 17345<br>ChemSpider: 16412            |  | Challenge 12<br>alpha-Hexachloro-<br>cyclohexane<br>$C_6H_6Cl_6$<br>PubChem: 727<br>ChemSpider:<br>10468511     |  |
| Challenge 13<br>Dimethyl<br>carbonotrithioate<br>$C_3H_6S_3$<br>PubChem: 16840<br>ChemSpider: 15959 |  | Challenge 14<br>O,O,O-Trimethyl<br>thiophosphate<br>$C_3H_9O_3PS$<br>PubChem: 9038<br>ChemSpider: 8686          |  |
| Challenge 15<br>Dibenzofuran<br>$C_{12}H_8O$<br>PubChem: 568<br>ChemSpider: 551                     |  | Challenge 16<br>O,S,S-Trimethyl<br>phosphorodithioate<br>$C_3H_9PS_2O_2$<br>PubChem: 31435<br>ChemSpider: 29165 |  |
